# Supplementary material for: Current tools for the identification of miRNA genes and their targets
Source: PubMed Central journal article supplement — Nucleic Acids Res. 2009 Mar 18;37(8):2419–33. doi: 10.1093/nar/gkp145 (PMC2677885; doi:10.1093/nar/gkp145), 2009-03-18
Supplement: gkp145_1.pdf [file gkp145_1.pdf]

## Supplementary Materials – Online Resources

The following table consists of a list of online resources for miRNA gene prediction and target identification. As the number of online resources grows rapidly we could not possibly be exhaustive in our enumeration, therefore we restricted our list to those resources which are related to the methods we discuss in the text.

### MiRNA Prediction

| Name        | Type | URL                                                                                                                                       | Classification   |
|-------------|------|-------------------------------------------------------------------------------------------------------------------------------------------|------------------|
| MIRSCAN     | W    | <a href="http://genes.mit.edu/mirscan/">http://genes.mit.edu/mirscan/</a>                                                                 | Filter-based     |
| MIRFINDER   | D    | <a href="http://www.bioinformatics.org/mirfinder/">http://www.bioinformatics.org/mirfinder/</a>                                           |                  |
| PROMIR      | W    | <a href="http://cbit.snu.ac.kr/~ProMiR2/">http://cbit.snu.ac.kr/~ProMiR2/</a>                                                             | Machine learning |
| TRIPLET SVM | D    | <a href="http://bioinfo.au.tsinghua.edu.cn/mirnasvm/">http://bioinfo.au.tsinghua.edu.cn/mirnasvm/</a>                                     |                  |
| RNAMICRO    | D    | <a href="http://www.bioinf.uni-leipzig.de/~jana/software/RNAMicro.html">http://www.bioinf.uni-leipzig.de/~jana/software/RNAMicro.html</a> |                  |
| MIPRED      | W    | <a href="http://www.bioinf.seu.edu.cn/miRNA/">http://www.bioinf.seu.edu.cn/miRNA/</a>                                                     |                  |
| MIRALIGN    | W    | <a href="http://bioinfo.au.tsinghua.edu.cn/miralign/">http://bioinfo.au.tsinghua.edu.cn/miralign/</a>                                     | Homology-based   |
| FINDMIRNA   | L    | <a href="http://sundarlab.ucdavis.edu/mirna/">http://sundarlab.ucdavis.edu/mirna/</a>                                                     | Target-centered  |

W : Webserver      D : Downloadable program      L : List of predictions

### Target Identification

| Name         | Type | URL                                                                                                               | Classification               |
|--------------|------|-------------------------------------------------------------------------------------------------------------------|------------------------------|
| MIRANDA      | L    | <a href="http://www.microrna.org/microrna/getMirnaForm.do">http://www.microrna.org/microrna/getMirnaForm.do</a>   | Seed-based                   |
| TARGETSCAN   | W    | <a href="http://www.targetscan.org/">http://www.targetscan.org/</a>                                               |                              |
| DIANA-MICROT | W    | <a href="http://diana.cslab.ece.ntua.gr/microT/">http://diana.cslab.ece.ntua.gr/microT/</a>                       |                              |
| RNAHYBRID    | W/D  | <a href="http://biserv.techfak.uni-bielefeld.de/rnahybrid/">http://biserv.techfak.uni-bielefeld.de/rnahybrid/</a> |                              |
| PICTAR       | L    | <a href="http://pictar.mdc-berlin.de/">http://pictar.mdc-berlin.de/</a>                                           | Machine learning             |
| TARGETBOOST  | W    | <a href="https://demo1.interagon.com/targetboost/">https://demo1.interagon.com/targetboost/</a>                   |                              |
| MITARGET     | W    | <a href="http://cbit.snu.ac.kr/~miTarget/">http://cbit.snu.ac.kr/~miTarget/</a>                                   | Target structure integration |
| MIRWIP       | L    | <a href="http://mirtargets.org">http://mirtargets.org</a>                                                         |                              |
| MICROTAR     | D    | <a href="http://tiger.dbs.nus.edu.sg/microtar/">http://tiger.dbs.nus.edu.sg/microtar/</a>                         |                              |

W : Webserver      D : Downloadable program      L : List of predictions
